# Supplementary material for: Mechanical exfoliation and electrical characterization of a one-dimensional Nb2Se9 atomic crystal
Source: Royal Society of Chemistry journal article supplement (doi:10.1039/c8ra07437b), 2018-01-01
Supplement: c8ra07437b1.pdf [file c8ra07437b1.pdf]

Electronic Supplementary Information for

## Mechanical exfoliation and electrical characterization of one-dimensional Nb<sub>2</sub>Se<sub>9</sub> atomic crystal

Bum Jun Kim<sup>a,†</sup>, Byung Joo Jeong<sup>b,†</sup>, Seung Bae Oh<sup>b</sup>, Su Dong Chae<sup>b</sup>, Kyung Hwan Choi<sup>a</sup>, Tuqeer Nasir<sup>a</sup>, Sang Hoon Lee<sup>b</sup>, Kwan-Woo Kim<sup>b</sup>, Hyung Kyu Lim<sup>b</sup>, Ik Jun Choi<sup>b</sup>, Linlin Chin<sup>b</sup>, Sang-Hwa Hyun<sup>c</sup>, Hak Ki Yu<sup>c</sup>, Jae-Hyun Lee<sup>c,\*</sup>, and Jae-Young Choi<sup>a,b,\*</sup>

<sup>a</sup>. SKKU Advanced Institute of Nanotechnology (SAINT), Sungkyunkwan University, Suwon, 16419, Korea

<sup>b</sup>. School of Advanced Materials Science & Engineering, Sungkyunkwan University, Suwon 16419, Korea

<sup>c</sup>. Dept. of Materials Science and Engineering & Dept. of Energy Systems Research, Ajou University, Suwon, 16499, Korea

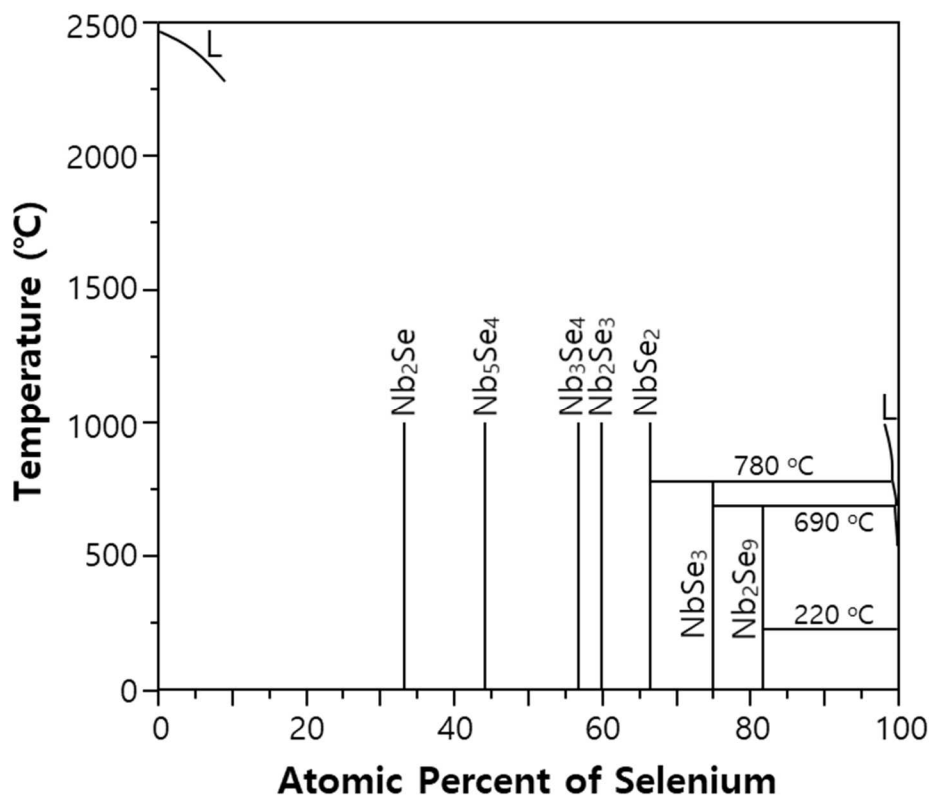

Figure S1. Phase diagram of Nb-Se binary system.

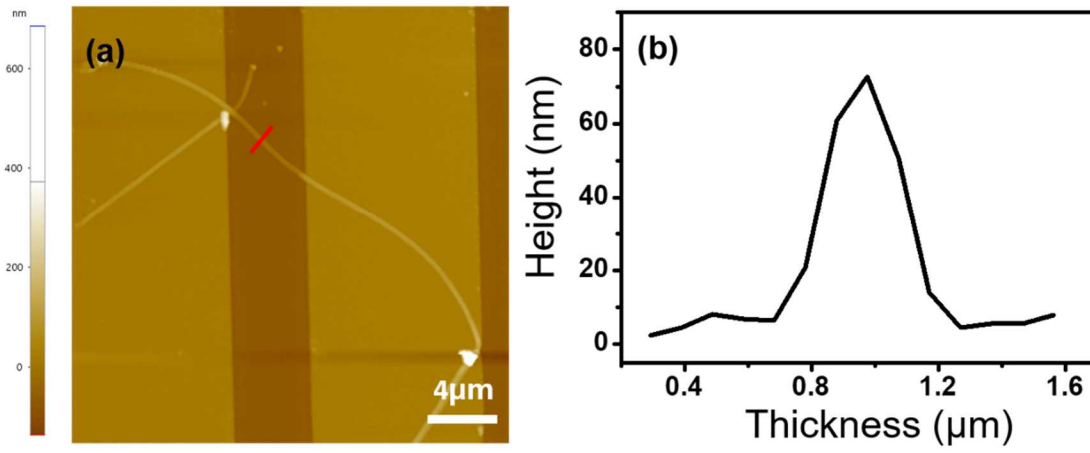

**Figure S2.** (a) AFM image of the Nb<sub>2</sub>Se<sub>9</sub> FET. (b) Line profile of the corresponding Nb<sub>2</sub>Se<sub>9</sub> flake, as marked in (a)
